# Supplementary material for: Tissue-specific programming of memory CD8 T cell subsets impacts protection against lethal respiratory virus infection
Source: PubMed Central journal article supplement — J Exp Med. 2016 Dec 12;213(13):2897–911. doi: 10.1084/jem.20160167 (PMC5154936; doi:10.1084/jem.20160167), 2016-12-12
Supplement: JEM_20160167_sm.pdf [file JEM_20160167_sm.pdf]

SUPPLEMENTAL MATERIAL

Abboud et al., <http://doi.org/jem.10.1084/20160167>

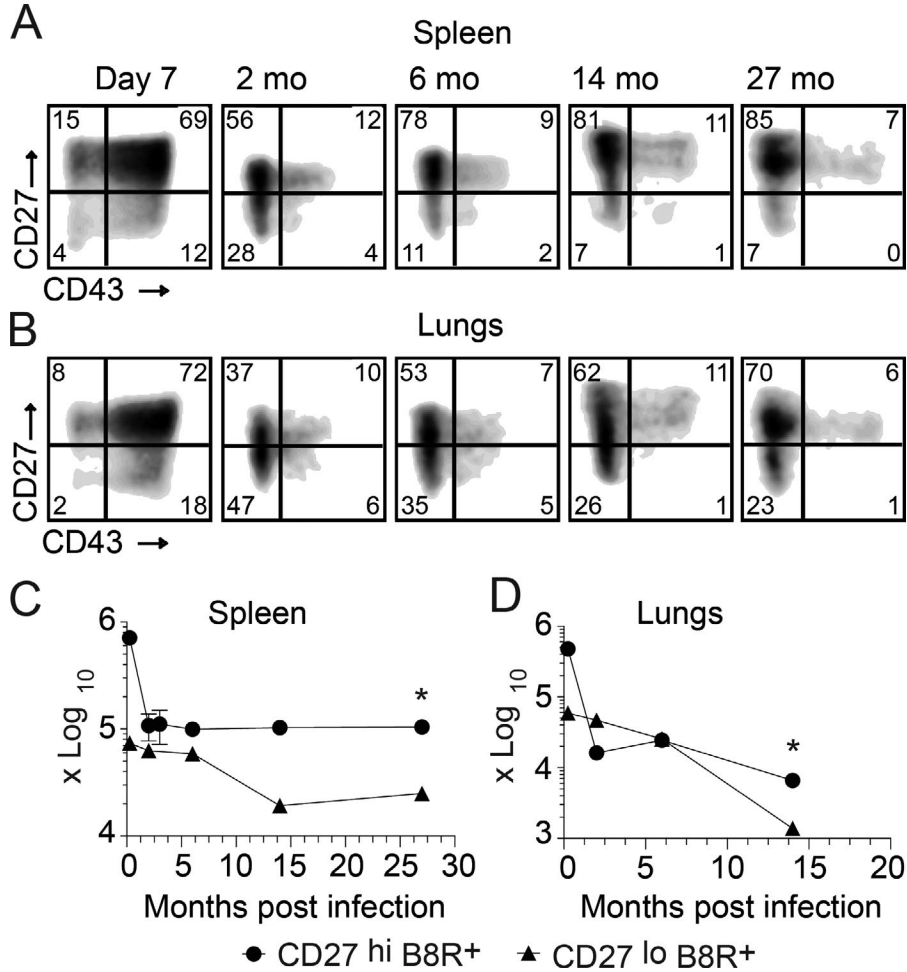

Figure S1. **Composition of splenic and lung memory CD8 T cell subsets after respiratory VACV-WR infection.** WT C57BL/6J mice were infected i.n. with a sublethal inoculum ( $1.5 \times 10^4$  PFU) of VACV-WR. At the indicated time points after infection, splenocytes (A) and lung cells (B) were harvested and stained for CD8, CD44, CD27, CD43, and VACV B8R<sub>20-27</sub>/K<sup>b</sup>-tetramer. (A and B) Representative FACS plots of CD27<sup>-</sup> and CD43-expressing cells after gating on CD8<sup>+</sup>CD44<sup>hi</sup> B8R<sub>20-27</sub>/K<sup>b</sup>-tetramer<sup>+</sup> cells. Numbers indicate percentages of gated cells in each quadrant. Quadrant setting based on naive CD44<sup>lo</sup> cells in the same host. Total number of CD8<sup>+</sup>CD44<sup>hi</sup> CD27<sup>hi</sup> or CD27<sup>lo</sup> cells per spleen (C) and lung (D) at the indicated time points after infection with VACV. Results are mean  $\pm$  SEM from three to four mice per group (at least three experiments). \*,  $P < 0.05$  (two-tailed Student's *t* test).

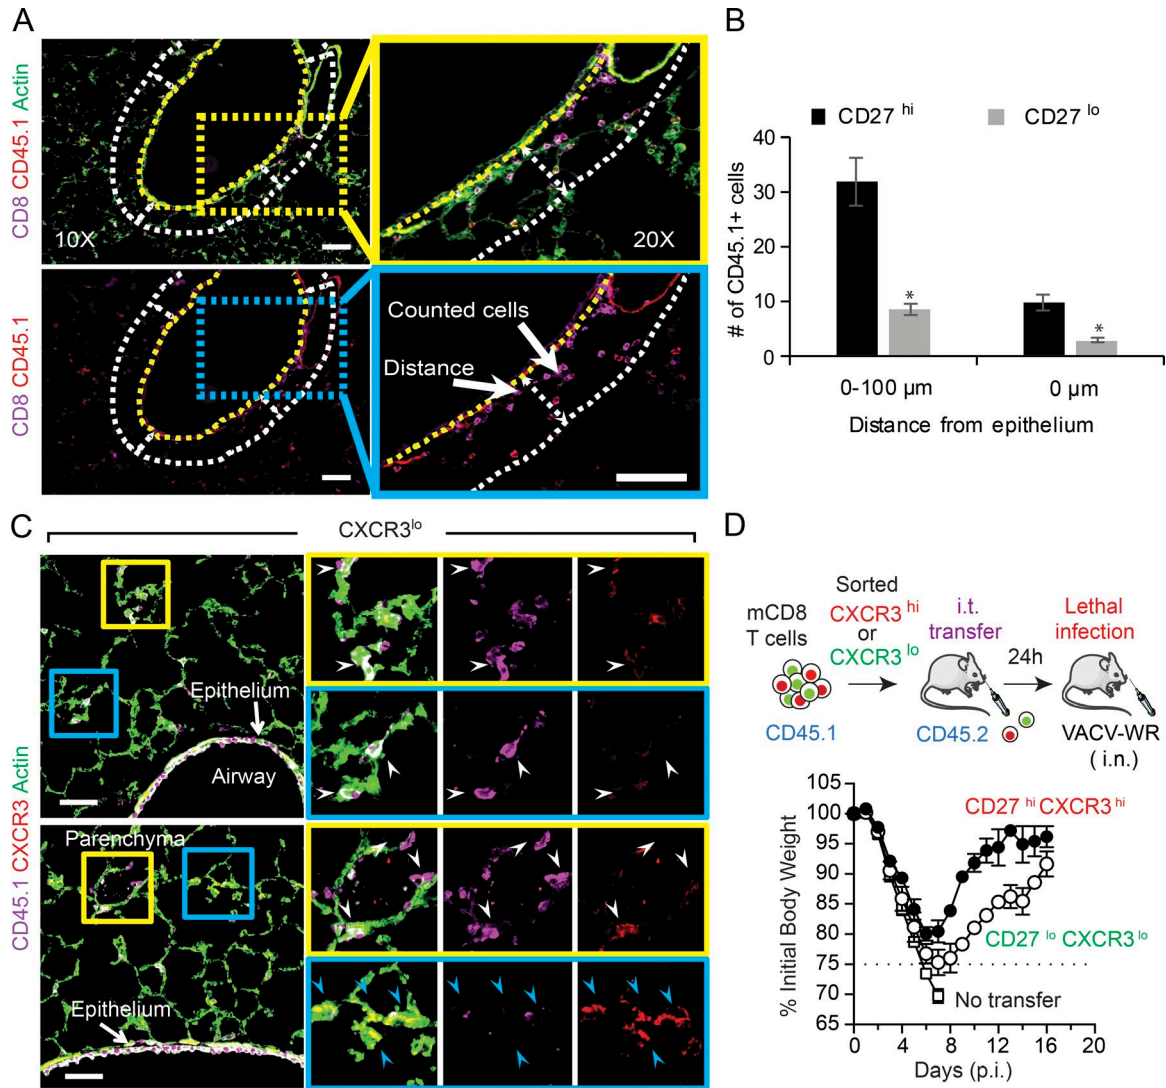

Figure S2. **CD27<sup>lo</sup> (CXCR3<sup>lo</sup>) memory CD8 T cells are visualized in the lung parenchyma but show reduced trafficking to airway epithelium and can protect against lethal challenge if localized to the initial sites of viral replication.** (A) IFA of lung sections from CD27<sup>hi</sup> or CD27<sup>lo</sup> recipient mice at day 7 after lethal infection are stained as in Fig. 3. The marked areas are shown in higher magnification to the right of each panel. (B) CD45.1<sup>+</sup> donor cells, which are in direct contact (0 μm; yellow dotted lines) or within a distance of 100 μm from airway epithelium (white dotted line), are counted in 30–40 regions per section. Bars: 100 μm. (C) IFA of lung sections from CD27<sup>lo</sup> (CXCR3<sup>lo</sup>) recipient mice stained with CXCR3 (red), CD45.1 (magenta), and ActinGreen (green). Donor CXCR3<sup>lo</sup> cells (magenta) are indicated with white arrows, and endogenous CXCR3<sup>hi</sup> CD8<sup>+</sup> cells (red) are delineated with blue arrows. Bars: 50 μm. (D) 30,000 CD44<sup>hi</sup>B8R<sub>20-27</sub>/K<sup>b</sup>-tetramer<sup>+</sup> CD27<sup>lo</sup> (CXCR3<sup>lo</sup>) or CD27<sup>hi</sup> (CXCR3<sup>hi</sup>) memory CD8 T cells were instilled into the lungs of naive mice via the trachea. 1 d later, recipient mice were lethally infected with VACV-WR and animals were weighed daily. Mean percent of initial body weight is shown. Data are from one representative experiment of at least three, with three to four mice per group. \*, P < 0.05 (two-tailed Student's *t* test).

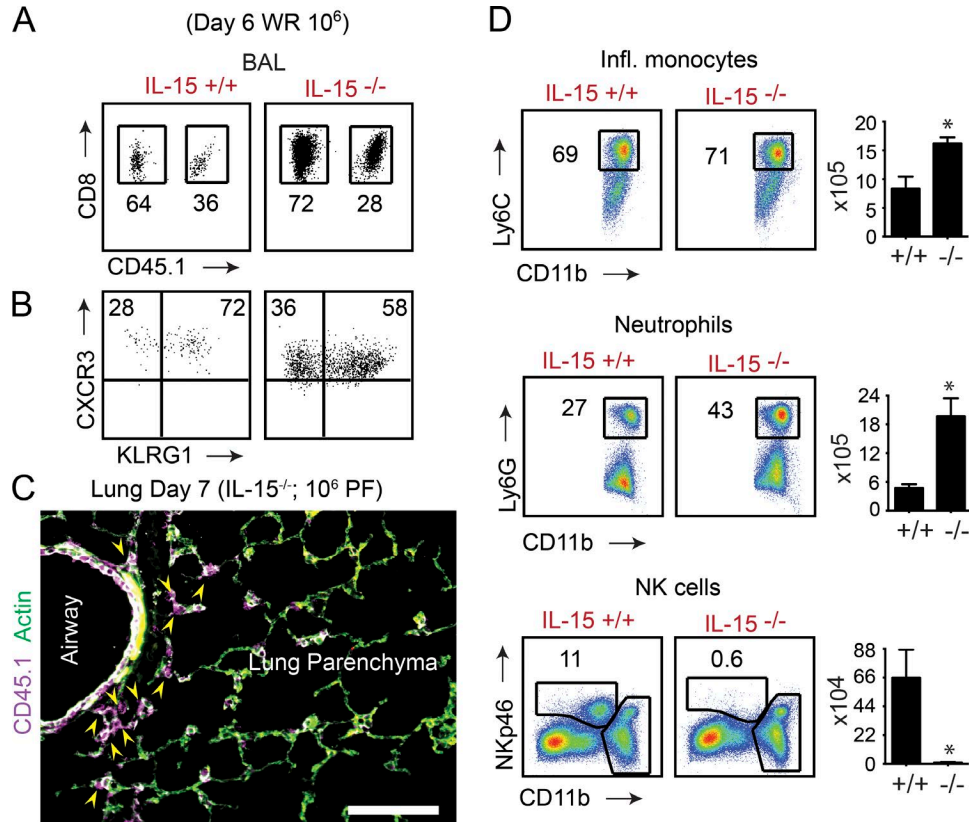

Figure S3. **IL-15<sup>-/-</sup> recipient mice have increased accumulation of donor CXCR3<sup>hi</sup> memory cells in the airways and in proximity of airway epithelium, as well as enhanced local innate immune response in the absence of NK cells after lethal respiratory VACV-WR infection.** Mice that received CD27<sup>hi</sup>/CXCR3<sup>hi</sup> CD8 memory cells in Fig. 5 H were analyzed at day 6 (A and B) or day 7 (C and D) after lethal infection. (A) Representative FACS plots showing total donor (CD45.1<sup>+</sup>) and host (CD45.1<sup>-</sup>) cells. (B) Representative FACS plots showing CXCR3 and KLRG1 expression on gated donor (CD45.1<sup>+</sup>) cells. Numbers indicate percentages of positive cells within the gated population. Quadrant setting based on naive CD44<sup>lo</sup> cells in the same host. (C) IFA of lung sections from IL-15<sup>-/-</sup> recipient mice stained with CD45.1 (magenta) and ActinGreen (green). Bar: 100  $\mu$ m. (D) Lung mononuclear cells were stained for CD3, CD11b, Siglec-F, Ly6G, Ly6C, and NKp46. Dead cells, doublets, and T cells are excluded. Representative FACS dot plots for NK cells (CD11b<sup>+</sup>NKp46<sup>+</sup>), Neutrophils (CD11b<sup>+</sup>Ly6G<sup>+</sup>) and inflammatory monocytes (CD11b<sup>+</sup>Ly6C<sup>hi</sup>), are shown. Total cell numbers in lungs are presented as the mean results  $\pm$  SEM from 3–4 mice per group (two to three experiments). \*, P < 0.05 (two-tailed Student's *t* test).
